# Supplementary material
Source: publisher figshare collection journal article supplement (https://diabetesjournals.figshare.com/articles/dataset/_/12732806)
Supplement: Supplementary file 1 [file 1]

## **Effect of dapagliflozin in DAPA-HF according to background glucose-lowering therapy**

### **SUPPLEMENT**

**Supplemental Table 1: Baseline Characteristics by glucose-lowering therapy use at randomization in patients with diabetes**

|                                                                 | No glucose lowering therapy<br>n=543 | Glucose lowering therapy<br>n=1,596 | p-value |
|-----------------------------------------------------------------|--------------------------------------|-------------------------------------|---------|
| Age – yr                                                        | 66.8±10.7                            | 66.4±9.6                            | 0.50    |
| Sex - no (%)                                                    |                                      |                                     | 0.24    |
| Female                                                          | 131 (24.1)                           | 346 (21.7)                          |         |
| Male                                                            | 412 (75.9)                           | 1,250 (78.3)                        |         |
| Race – no. (%)†                                                 |                                      |                                     | 0.66    |
| White                                                           | 370 (68.1)                           | 1,119 (70.1)                        |         |
| Asian                                                           | 135 (24.9)                           | 356 (22.3)                          |         |
| Black                                                           | 31 ( 5.7)                            | 97 ( 6.1)                           |         |
| Other                                                           | 7 ( 1.3)                             | 24 ( 1.5)                           |         |
| Region – no. (%)                                                |                                      |                                     | <0.001  |
| Asia/Pacific                                                    | 132 (24.3)                           | 347 (21.7)                          |         |
| Europe                                                          | 270 (49.7)                           | 681 (42.7)                          |         |
| North America                                                   | 75 (13.8)                            | 260 (16.3)                          |         |
| South America                                                   | 66 (12.2)                            | 308 (19.3)                          |         |
| NYHA functional classification – no. (%)                        |                                      |                                     | 0.002   |
| II                                                              | 316 (58.2)                           | 1,046 (65.5)                        |         |
| III                                                             | 217 (40.0)                           | 538 (33.7)                          |         |
| IV                                                              | 10 ( 1.8)                            | 12 ( 0.8)                           |         |
| Heart rate – beats/min                                          | 71.7±11.0                            | 72.5±11.5                           | 0.14    |
| Systolic Blood Pressure – mmHg                                  | 121.4±15.7                           | 124.0±16.8                          | 0.002   |
| Left ventricular ejection fraction – %                          | 30.9±6.9                             | 31.3±6.6                            | 0.16    |
| Median NT-proBNP (IQR) – pg/ml                                  | 1584.8<br>(930.6-3049.3)             | 1444.6<br>(887.3-2763.3)            | 0.057   |
| Median KCCQ-TSS (IQR)                                           | 75.0 (55.2-90.6)                     | 75.0 (56.2-91.7)                    | 0.63    |
| HbA1c – %                                                       | 6.9±1.2                              | 7.5±1.6                             | <0.001  |
| HbA1c – mmol/mol                                                | 52.3±12.8                            | 59.0±17.6                           | <0.001  |
| Median time from diagnosis of diabetes to randomization (years) | 0.5 (0.0-5.0)                        | 8.6 (3.9-15.0)                      | <0.001  |
| Body-mass index§                                                | 28.4±5.7                             | 29.6±6.1                            | <0.001  |
| Principal cause of heart failure – no. (%)                      |                                      |                                     | 0.29    |
| Ischaemic                                                       | 323 (59.5)                           | 1,010 (63.3)                        |         |
| Non-ischaemic                                                   | 178 (32.8)                           | 476 (29.8)                          |         |
| Unknown                                                         | 42 ( 7.7)                            | 110 ( 6.9)                          |         |
| Medical history – no. (%)                                       |                                      |                                     |         |
| Hospitalization for heart failure                               | 263 (48.4)                           | 786 (49.2)                          | 0.74    |
| Atrial fibrillation                                             | 224 (41.3)                           | 572 (35.8)                          | 0.024   |
| Estimated GFR – ml/min/1.73 m <sup>2</sup> of body-surface area | 64.3±19.6                            | 63.0±19.3                           | 0.18    |
| Estimated GFR rate < 60 ml/min/1.73 m <sup>2</sup> – no. (%)    | 238 (43.8)                           | 744 (46.6)                          | 0.26    |
| Device therapy – no (%)                                         |                                      |                                     |         |
| Implantable cardioverter-defibrillator‡                         | 140 (25.8)                           | 437 (27.4)                          | 0.47    |
| Cardiac-resynchronization therapy*                              | 32 ( 5.9)                            | 119 ( 7.5)                          | 0.22    |
| Heart failure medication at randomization visit – no (%)        |                                      |                                     |         |
| Diuretic                                                        | 476 (87.7)                           | 1,408 (88.2)                        | 0.73    |
| ACE-inhibitor                                                   | 297 (54.7)                           | 875 (54.8)                          | 0.96    |
| ARB                                                             | 152 (28.0)                           | 463 (29.0)                          | 0.65    |

|                                       |            |              |       |
|---------------------------------------|------------|--------------|-------|
| Sacubitril-valsartan                  | 66 (12.2)  | 163 (10.2)   | 0.21  |
| Beta-blocker                          | 518 (95.4) | 1,549 (97.1) | 0.064 |
| Mineralocorticoid receptor antagonist | 398 (73.3) | 1,131 (70.9) | 0.28  |
| Digitalis                             | 116 (21.4) | 313 (19.6)   | 0.38  |
| Glucose lowering medication — no.(%)  |            |              |       |
| Metformin                             | 0 ( 0.0)   | 1,020 (63.9) | -     |
| Sulfonylurea                          | 0 ( 0.0)   | 440 (27.6)   | -     |
| DPP-4 inhibitor                       | 0 ( 0.0)   | 310 (19.4)   | -     |
| Insulin                               | 0 ( 0.0)   | 540 (33.8)   | -     |
| GLP-1 receptor agonist                | 0 ( 0.0)   | 21 ( 1.3)    | -     |
| Alpha glucosidase inhibitors          | 0 ( 0.0)   | 91 ( 5.7)    | -     |
| Thiazolidinediones                    | 0 ( 0.0)   | 12 ( 0.8)    | -     |
| Other medications**                   | 0 ( 0.0)   | 31 ( 1.9)    | -     |

ACE denotes angiotensin-converting enzyme, ARB angiotensin-receptor blocker, DPP-4 dipeptidyl peptidase 4, GFR glomerular filtration rate, GLP-1 glucagon-like peptide 1, IQR interquartile range, LVEF left ventricular ejection fraction, MRA mineralocorticoid receptor antagonist, N-terminal pro-B-type natriuretic peptide and NYHA New York Heart Association. KCCQ-TSS Kansas City Cardiomyopathy Questionnaire total symptom score - range from 0 to 100, with higher scores indicating fewer symptoms and physical limitations associated with heart failure. A score of 75 or above is considered to reflect satisfactory health status.

† Race was reported by the investigators

§ The body-mass index is the weight in kilograms divided by the square of the height in meters.

‡ Either implantable cardioverter-defibrillator or cardiac resynchronization therapy with a defibrillator.

\*Cardiac-resynchronisation therapy with or without a defibrillator.

\*\*Other medications were: glinides (n=28[1.8%]); aldose reductase inhibitors (n=2[0.1%]); and SGLT2-inhibitors (n=2[0.1%]).

**Supplemental Table 2: Baseline Characteristics by class of glucose-lowering therapy at randomization in patients with diabetes**

|                                                                 | <b>All patients<br/>n=2,139</b> | <b>Biguanide<br/>n=1,020</b> | <b>Sulfonylurea<br/>n=440</b> | <b>DPP-IV<br/>inhibitor<br/>n=310</b> | <b>Insulin<br/>n=540</b> |
|-----------------------------------------------------------------|---------------------------------|------------------------------|-------------------------------|---------------------------------------|--------------------------|
| Age – yr                                                        | 66.5±9.9                        | 65.9±9.6                     | 66.3±9.8                      | 68.5±9.4                              | 66.1±8.9                 |
| Sex - no (%)                                                    |                                 |                              |                               |                                       |                          |
| Female                                                          | 477 (22.3)                      | 230 (22.5)                   | 96 (21.8)                     | 58 (18.7)                             | 128 (23.7)               |
| Male                                                            | 1,662 (77.7)                    | 790 (77.5)                   | 344 (78.2)                    | 252 (81.3)                            | 412 (76.3)               |
| Race – no. (%)†                                                 |                                 |                              |                               |                                       |                          |
| White                                                           | 1,489 (69.6)                    | 745 (73.0)                   | 304 (69.1)                    | 151 (48.7)                            | 404 (74.8)               |
| Asian                                                           | 491 (23.0)                      | 192 (18.8)                   | 106 (24.1)                    | 144 (46.5)                            | 87 (16.1)                |
| Black or African American                                       | 128 (6.0)                       | 64 (6.3)                     | 26 ( 5.9)                     | 13 (4.2)                              | 41 (7.6)                 |
| Other                                                           | 31 (1.4)                        | 19 (1.9)                     | 4 ( 0.9)                      | 2 (0.6)                               | 8 (1.5)                  |
| Region – no. (%)                                                |                                 |                              |                               |                                       |                          |
| Asia/Pacific                                                    | 479 (22.4)                      | 186 (18.2)                   | 103 (23.4)                    | 143 (46.1)                            | 82 (15.2)                |
| Europe                                                          | 951 (44.5)                      | 445 (43.6)                   | 201 (45.7)                    | 93 (30.0)                             | 228 (42.2)               |
| North America                                                   | 335 (15.7)                      | 153 (15.0)                   | 71 (16.1)                     | 48 (15.5)                             | 123 (22.8)               |
| South America                                                   | 374 (17.5)                      | 236 (23.1)                   | 65 (14.8)                     | 26 (8.4)                              | 107 (19.8)               |
| NYHA functional classification – no. (%)                        |                                 |                              |                               |                                       |                          |
| II                                                              | 1,362 (63.7)                    | 684 (67.1)                   | 274 (62.3)                    | 239 (77.1)                            | 335 (62.0)               |
| III                                                             | 755 (35.3)                      | 331 (32.5)                   | 164 (37.3)                    | 69 (22.3)                             | 198 (36.7)               |
| IV                                                              | 22 (1.0)                        | 5 (0.5)                      | 2 ( 0.5)                      | 2 (0.6)                               | 7 (1.3)                  |
| Heart rate – beats/min                                          | 72.3±11.3                       | 73.0±11.7                    | 74.3±11.6                     | 72.6±11.1                             | 71.6±11.4                |
| Systolic Blood Pressure – mmHg                                  | 123.3±16.5                      | 124.0±17.0                   | 125.3±16.9                    | 123.6±17.8                            | 124.3±17.1               |
| Left ventricular ejection fraction – %                          | 31.2±6.7                        | 31.4±6.5                     | 31.1±6.7                      | 31.4±6.7                              | 31.6±6.4                 |
| Median NT-proBNP (IQR) – pg/ml                                  | 1484<br>(894-2818)              | 1432<br>(867-2617)           | 1504.7<br>(887.5-2741.2)      | 1348<br>(876-2337)                    | 1481<br>(891-2876)       |
| Median KCCQ-TSS (IQR)                                           | 75.0<br>(56.3-91.7)             | 75.0<br>(57.3-91.7)          | 77.1 (57.3-<br>91.7)          | 83.3<br>(64.6-97.9)                   | 69.8<br>(50.0-87.5)      |
| HbA1c – %                                                       | 7.4±1.5                         | 7.5±1.7                      | 7.8±1.7                       | 7.3±1.3                               | 8.2±1.6                  |
| HbA1c – mmol/mol                                                | 57.3±16.8                       | 58.2±18.2                    | 61.6±18.9                     | 56.5±14.5                             | 66.7±17.9                |
| Median time from diagnosis of diabetes to randomization (years) | 6.6 (1.7-12.8)                  | 7.7 (3.4-14.0)               | 8.3 (4.4-15.1)                | 9.9 (4.9-16.4)                        | 12.9 (7.7-18.3)          |

|                                                                 |              |               |             |             |             |
|-----------------------------------------------------------------|--------------|---------------|-------------|-------------|-------------|
| Body-mass index§                                                | 29.3±6.0     | 29.7±6.0      | 29.3±5.9    | 28.2±6.3    | 30.7±6.4    |
| Principal cause of heart failure – no. (%)                      |              |               |             |             |             |
| Ischemic                                                        | 1,333 (62.3) | 617 (60.5)    | 281 (63.9)  | 189 (61.0)  | 369 (68.3)  |
| Non-ischemic                                                    | 654 (30.6)   | 323 (31.7)    | 128 (29.1)  | 101 (32.6)  | 135 (25.0)  |
| Unknown                                                         | 152 (7.1)    | 80 (7.8)      | 31 ( 7.0)   | 20 (6.5)    | 36 (6.7)    |
| Medical history – no. (%)                                       |              |               |             |             |             |
| Hospitalization for heart failure                               | 1,049 (49.0) | 486 (47.6)    | 206 (46.8)  | 151 (48.7)  | 274 (50.7)  |
| Atrial fibrillation                                             | 796 (37.2)   | 358 (35.1)    | 142 (32.3)  | 108 (34.8)  | 185 (34.3)  |
| Estimated GFR – ml/min/1.73 m <sup>2</sup> of body-surface area | 63.4±19.4    | 66.3±19.0     | 63.5±19.5   | 59.1±17.9   | 59.0±19.6   |
| Estimated GFR rate < 60 ml/min/1.73 m <sup>2</sup> – no. (%)    | 982 (45.9)   | 402 (39.4)    | 198 (45.0)  | 164 (52.9)  | 304 (56.3)  |
| Device therapy – no (%)                                         |              |               |             |             |             |
| Implantable cardioverter-defibrillator‡                         | 577 (27.0)   | 259 (25.4)    | 103 (23.4)  | 74 (23.9)   | 173 (32.0)  |
| Cardiac-resynchronization therapy*                              | 151 (7.1)    | 70 (6.9)      | 24 ( 5.5)   | 26 (8.4)    | 52 (9.6)    |
| Heart failure medication at randomization visit – no (%)        |              |               |             |             |             |
| Diuretic                                                        | 1,884 (88.1) | 889 (87.2)    | 398 (90.5)  | 264 (85.2)  | 500 (92.6)  |
| ACE-inhibitor                                                   | 1,172 (54.8) | 571 (56.0)    | 229 (52.0)  | 134 (43.2)  | 302 (55.9)  |
| ARB                                                             | 615 (28.8)   | 304 (29.8)    | 136 (30.9)  | 111 (35.8)  | 142 (26.3)  |
| Sacubitril-valsartan                                            | 229 (10.7)   | 100 (9.8)     | 42 ( 9.5)   | 41 (13.2)   | 60 (11.1)   |
| Beta-blocker                                                    | 2,067 (96.6) | 986 (96.7)    | 427 (97.0)  | 295 (95.2)  | 527 (97.6)  |
| Mineralocorticoid receptor antagonist                           | 1,529 (71.5) | 743 (72.8)    | 311 (70.7)  | 194 (62.6)  | 368 (68.1)  |
| Digitalis                                                       | 429 (20.1)   | 209 (20.5)    | 93 (21.1)   | 45 (14.5)   | 106 (19.6)  |
| Glucose lowering medication — no.(%)                            |              |               |             |             |             |
| Metformin                                                       | 1,020 (47.7) | 1,020 (100.0) | 269 (61.1)  | 173 (55.8)  | 223 (41.3)  |
| Sulfonylurea                                                    | 440 (20.6)   | 269 (26.4)    | 440 (100.0) | 82 (26.5)   | 62 (11.5)   |
| DPP-4 inhibitor                                                 | 310 (14.5)   | 173 (17.0)    | 82 (18.6)   | 310 (100.0) | 75 (13.9)   |
| Insulin                                                         | 540 (25.2)   | 223 (21.9)    | 6 ( 1.4)    | 75 (24.2)   | 540 (100.0) |
| GLP-1 receptor agonist                                          | 21 (1.0)     | 9 (0.9)       | 62 (14.1)   | 1 (0.3)     | 11 (2.0)    |
| Alpha glucosidase inhibitors                                    | 91 (4.3)     | 40 (3.9)      | 1 ( 0.2)    | 19 (6.1)    | 23 (4.3)    |
| Thiazolidinediones                                              | 12 (0.6)     | 9 (0.9)       | 23 ( 5.2)   | 5 (1.6)     | 1 (0.2)     |
| Other medications**                                             | 31 (1.4)     | 10 (1.0)      | 3 ( 0.7)    | 9 (2.9)     | 10 (1.9)    |

ACE denotes angiotensin-converting enzyme, ARB angiotensin-receptor blocker, DPP-4 dipeptidyl peptidase 4, GFR glomerular filtration rate, GLP-1 glucagon-like peptide 1, IQR interquartile range, LVEF left ventricular ejection fraction, MRA mineralocorticoid receptor antagonist, N-terminal pro-B-type natriuretic peptide and NYHA New York Heart Association. KCCQ-TSS Kansas City Cardiomyopathy Questionnaire total symptom score - range from 0 to 100, with higher scores indicating fewer symptoms and physical limitations associated with heart failure. A score of 75 or above is considered to reflect satisfactory health status.

† Race was reported by the investigators

§ The body-mass index is the weight in kilograms divided by the square of the height in meters.

‡ Either implantable cardioverter-defibrillator or cardiac resynchronization therapy with a defibrillator.

\*Cardiac-resynchronisation therapy with or without a defibrillator.

\*\*Other medications were: glinides (n=28[1.8%]); aldose reductase inhibitors (n=2[0.1%]); and SGLT2-inhibitors (n=2[0.1%])

**Supplemental Figure 1: Cumulative incidence of cardiovascular death or worsening heart failure event by background glucose-lowering therapy use in patients with diabetes**

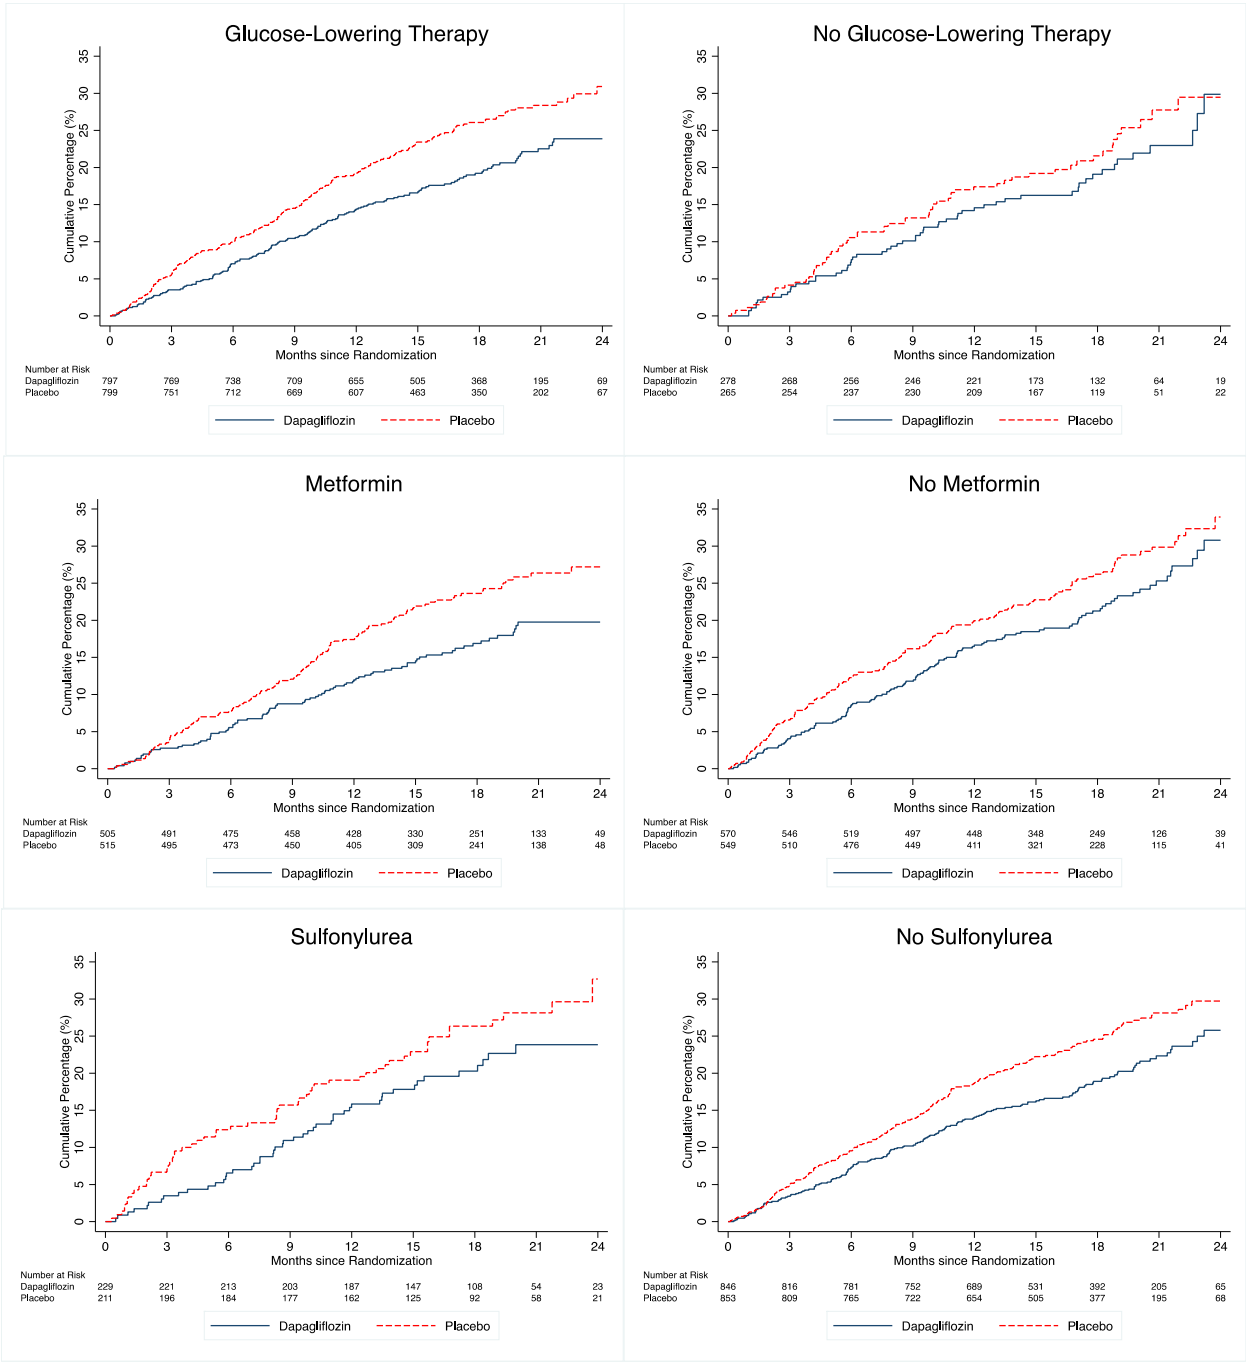

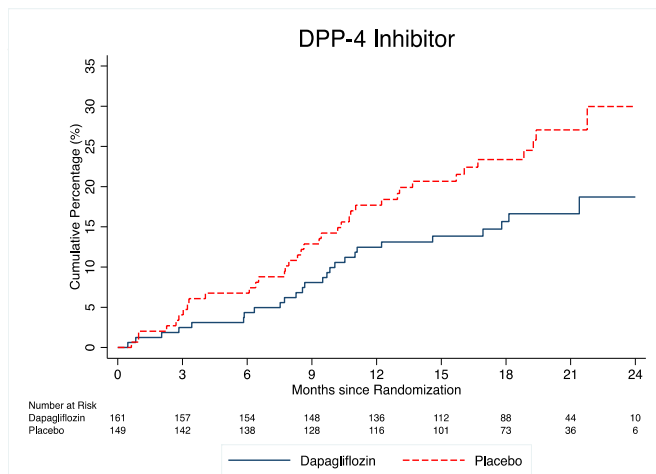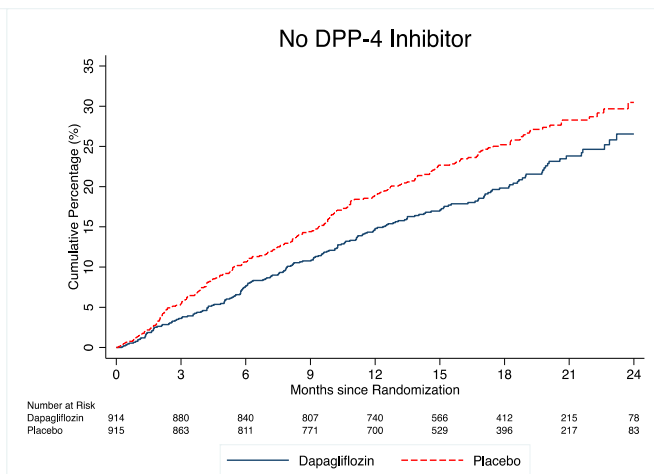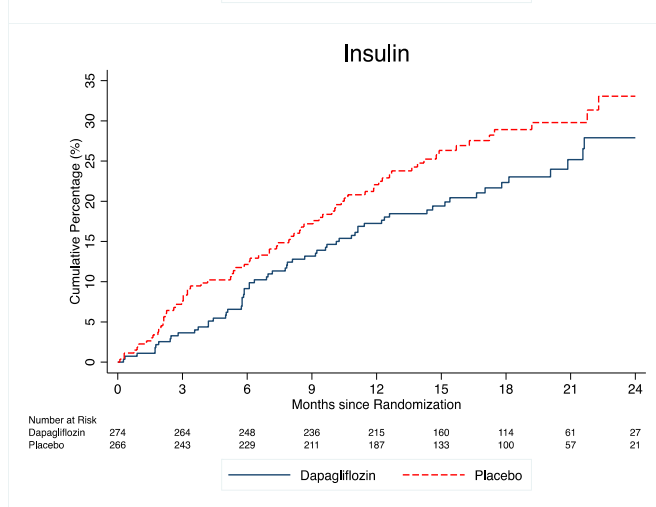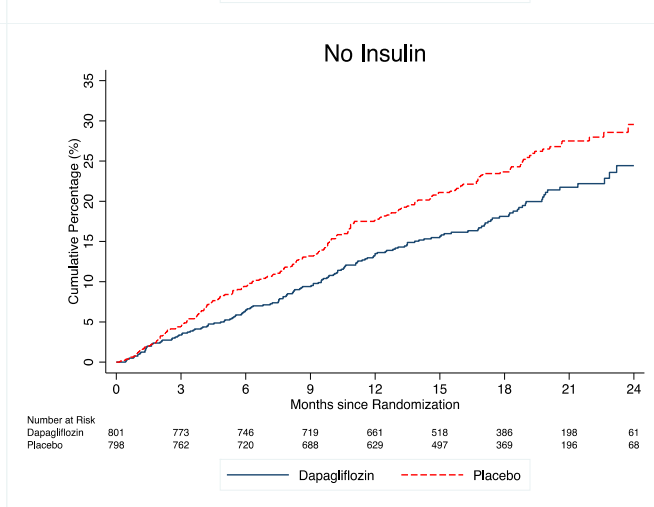



**Supplemental Figure 2: Effect of dapagliflozin compared to placebo on the risk of outcomes by combinations of background glucose-lowering therapy in patients with diabetes**

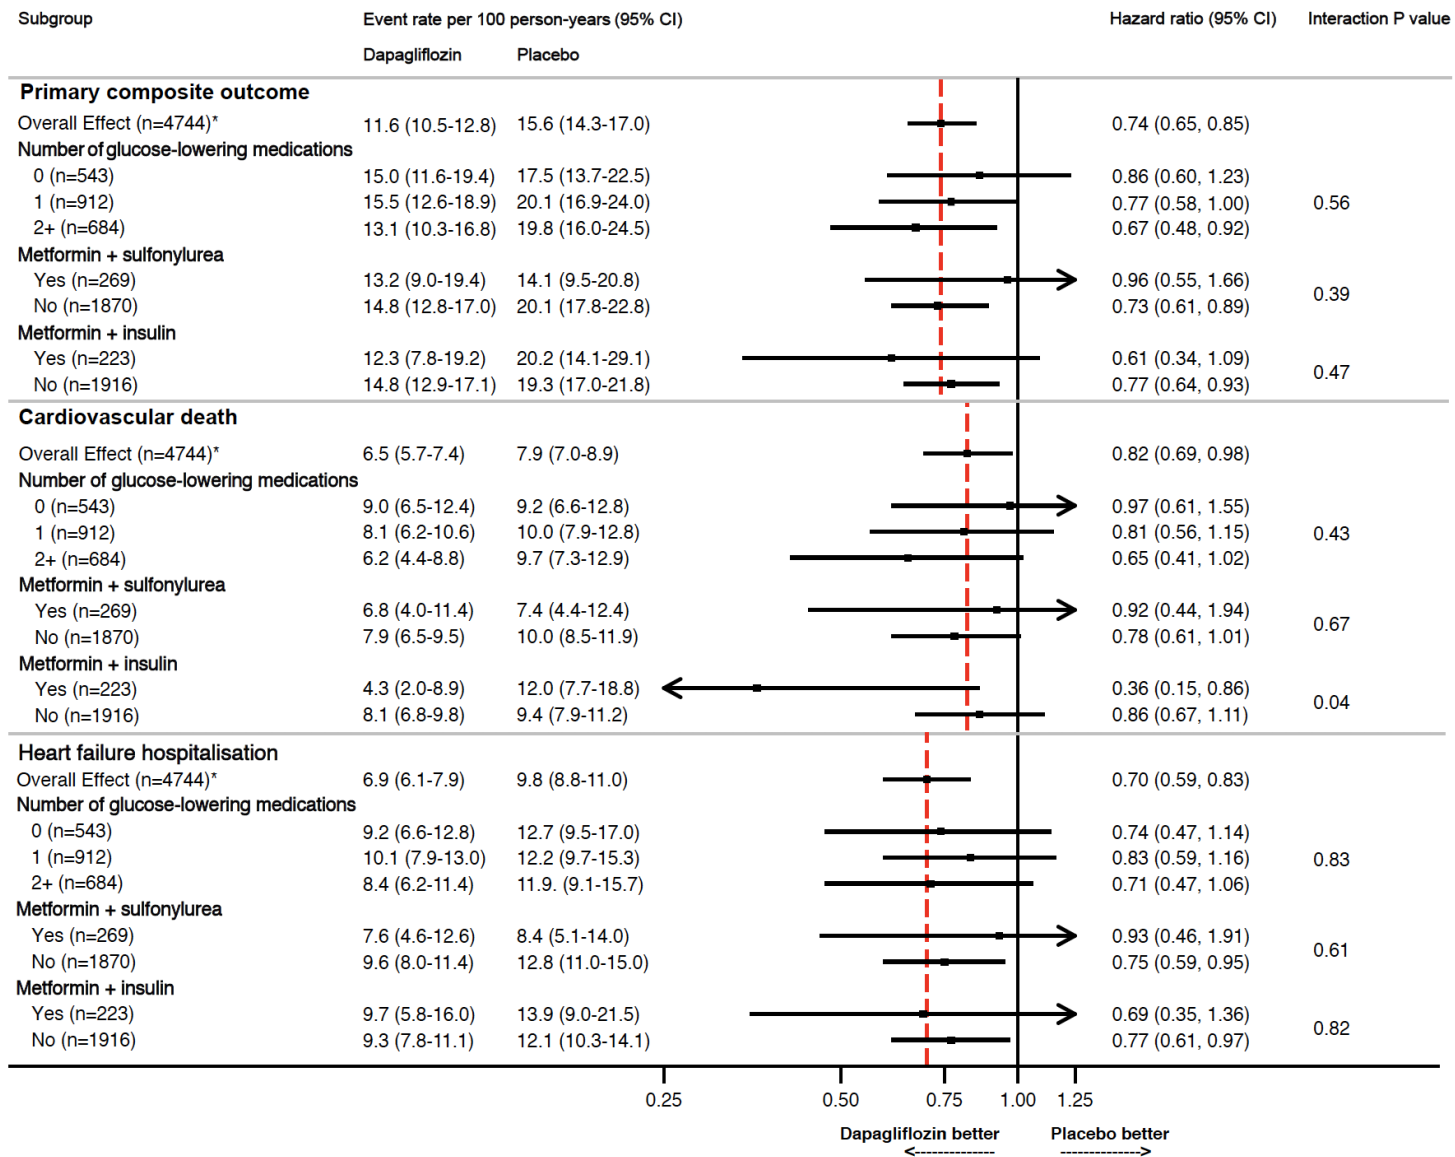

\*Overall effect calculated in all randomized patients (n=4744)

**Supplemental Figure 3: Effect of dapagliflozin compared to placebo on the risk of cardiovascular death and heart failure hospitalization by background glucose-lowering therapy in patients with diabetes**

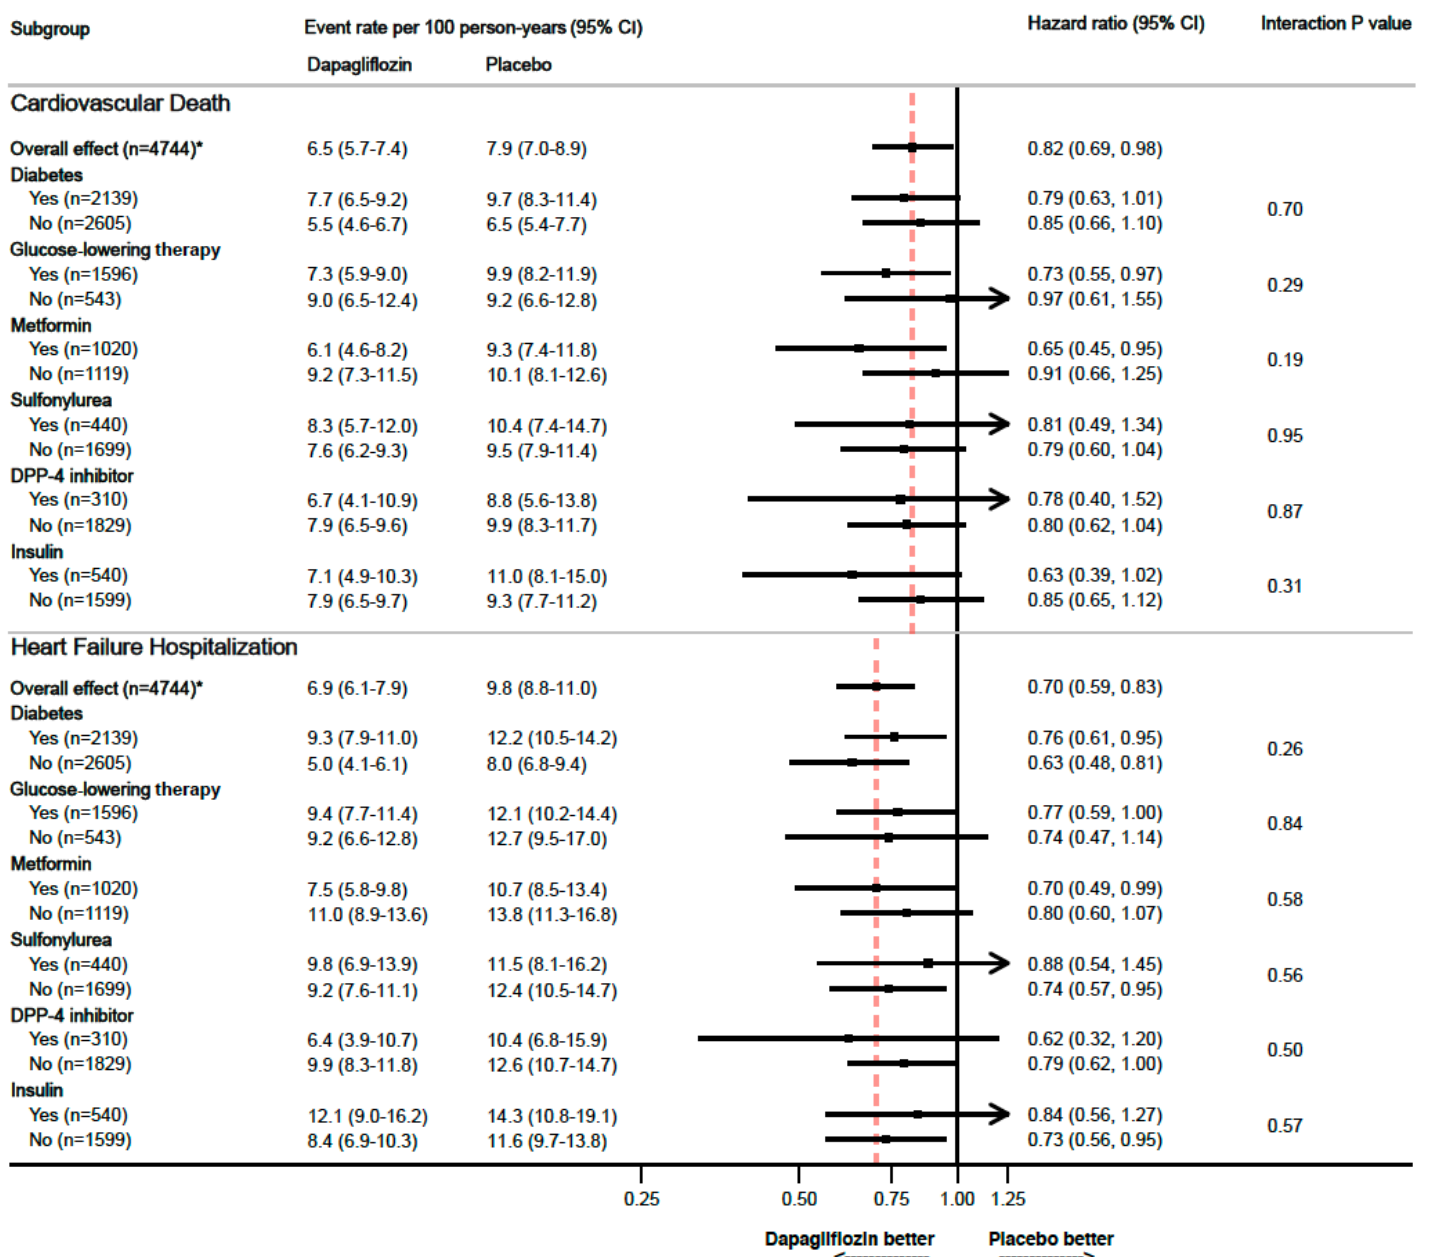

\*Overall effect calculated in all randomized patients (n=4744)

DPP-4 = dipeptidyl peptidase-4; CI = confidence interval.

**Supplemental Figure 4: Effect of dapagliflozin compared to placebo on the risk of first and recurrent HF hospitalizations and cardiovascular death by background glucose-lowering therapy in patients with diabetes**

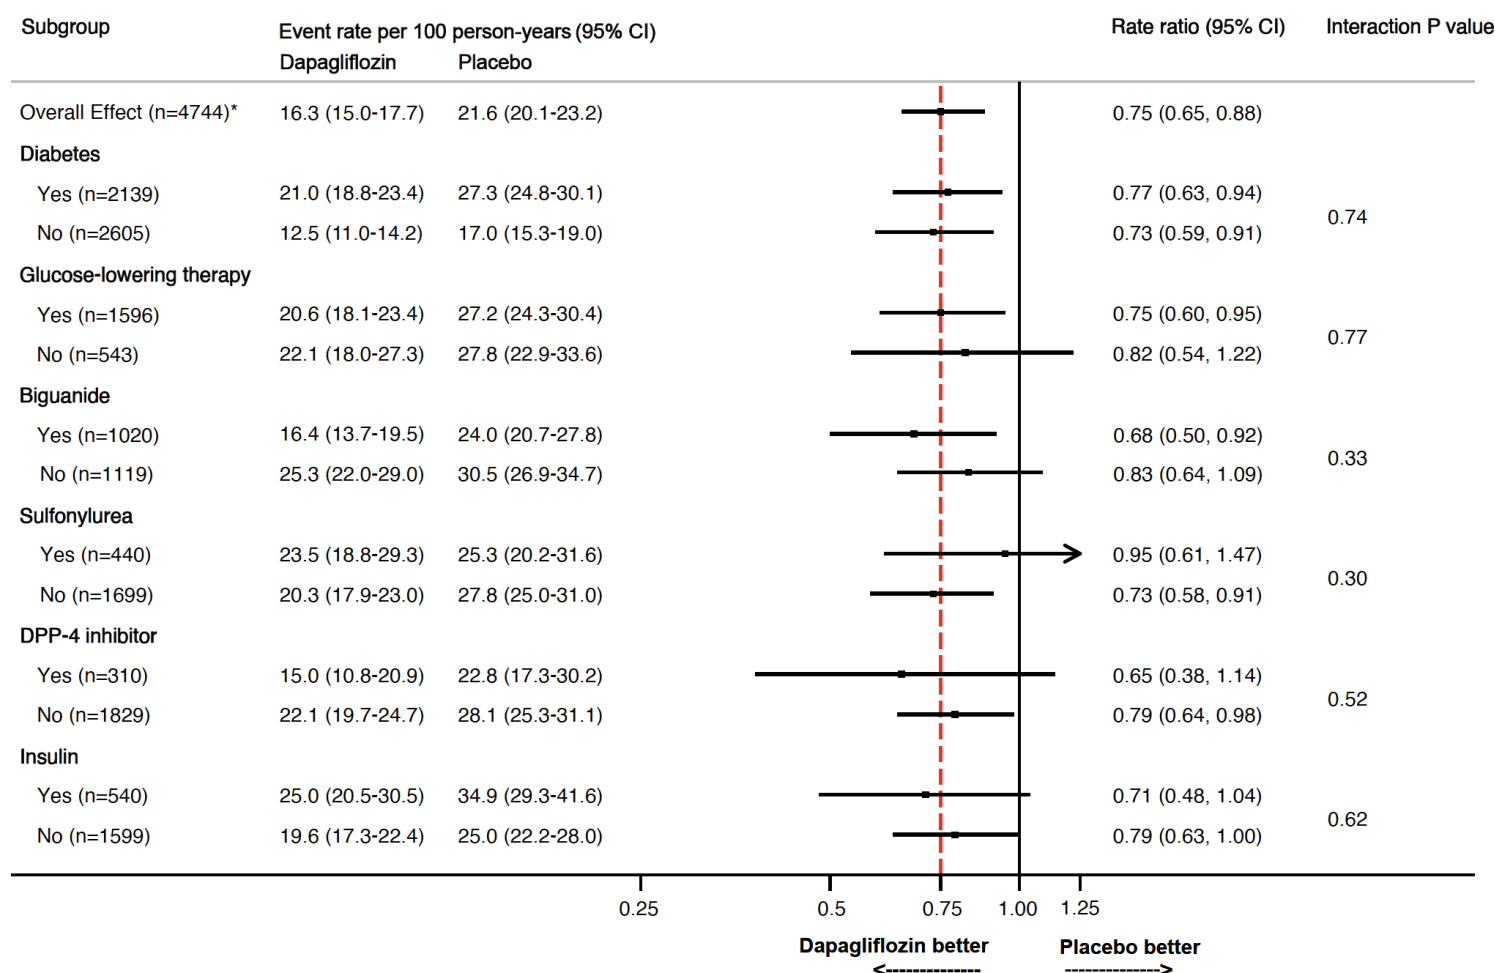

\*Overall effect calculated in all randomized patients (n=4744)

The treatment effect estimate is displayed as a rate ratio which was calculated using a semiparametric proportional-rates model to calculate total (including recurrent) events (as described by Lin DY et al. in *Semiparametric regression for the mean and rate functions of recurrent events. J R Stat Soc Series B Stat Methodol* 2000; 62: 711-30)

DPP-4 = dipeptidyl peptidase-4; CI = confidence interval.

**Supplemental Figure 5: Effect of dapagliflozin compared to placebo on the risk of death from any cause by background glucose-lowering therapy in patients with diabetes**

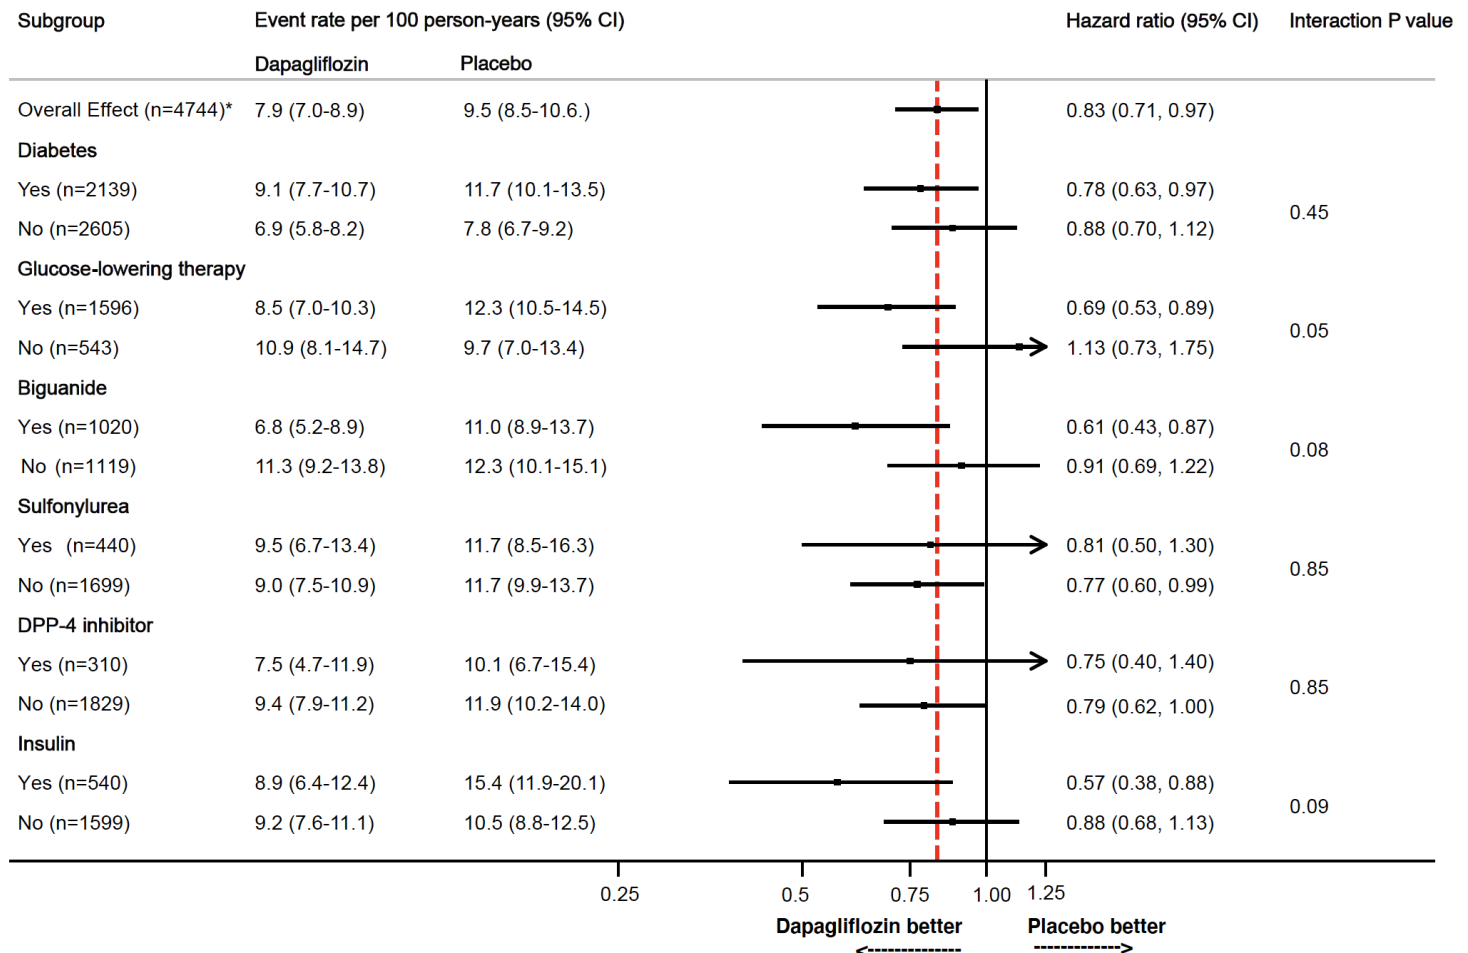

\*Overall effect calculated in all randomized patients (n=4744)

DPP-4 = dipeptidyl peptidase-4; CI = confidence interval.
